# Supplementary material for: Stainless steel-derived nano-porous oxide: a cost-efficient, stable, and corrosion-resistant hydrogen evolution catalyst
Source: Royal Society of Chemistry journal article supplement (doi:10.1039/d4ta03317e), 2024-01-01
Supplement: d4ta03317e1.pdf [file d4ta03317e1.pdf]

## **Supporting information**

### **Stainless steel-derived nano-porous oxide: A cost-efficient, stable, and corrosion-resistant hydrogen evolution catalyst.**

Ranjith Bose<sup>1,2,\*</sup>, Surya Prakash Gajagouni<sup>3</sup>, Imad Barsoum<sup>3</sup>, Sung Oh Cho<sup>4</sup>, and Akram Alfantazi<sup>1,2,\*</sup>

*<sup>1</sup>Department of Chemical and Petroleum Engineering, Khalifa University, Abu Dhabi 127788, United Arab Emirates.*

*<sup>2</sup>Emirates Nuclear Technology Center (ENTC), Khalifa University, Abu Dhabi 127788, United Arab Emirates.*

*<sup>3</sup>Department of Mechanical and Nuclear Engineering, Khalifa University, Abu Dhabi 127788, United Arab Emirates.*

*<sup>5</sup>Department of Nuclear and Quantum Engineering, Korea Advanced Institute of Science and Technology (KAIST), Daejeon 34141, South Korea.*

Corresponding author: Dr. Ranjith Bose and Prof. Akram Alfantazi

E-mail: [ranjith.bose@ku.ac.ae](mailto:ranjith.bose@ku.ac.ae) and [akram.alfantazi@ku.ac.ae](mailto:akram.alfantazi@ku.ac.ae)

| <b><u>TABLE OF CONTENT</u></b> |                                                                                                                     |
|--------------------------------|---------------------------------------------------------------------------------------------------------------------|
| Materials Characterization     |                                                                                                                     |
| Electrochemical measurements   |                                                                                                                     |
| Figure S1                      | Digital images of anodization experiments                                                                           |
| Figure S2                      | Digital images of prepared samples                                                                                  |
| Figure S3                      | SEM and Cross-section images of bare SS, and anodized SS samples                                                    |
| Figure S4                      | EDX spectrum of bare SS                                                                                             |
| Figure S5                      | Low and high magnification SEM and Cross-sectional images of anodized SS (SS-65 V and SS-85 V) samples              |
| Figure S6                      | Low and high-magnification SEM images of anodized SS- 90 V sample                                                   |
| Figure S7                      | Schematic illustration of anodized stainless steel                                                                  |
| Figure S8                      | XRD patterns of bare SS and anodized SS samples                                                                     |
| Figure S9                      | XPS survey spectrum of SS-75 V sample                                                                               |
| Figure S10                     | Long-term chronoamperometric (CA) stability measurement at -100 mA cm <sup>-2</sup> for the SS-75 V electrode.      |
| Figure S11                     | CV curves for anodized SS at different scan rates to estimate the C <sub>dl</sub> in a non-faradic potential range. |
| Figure S12                     | XPS survey spectrum of anodized SS-75 V electrode after CA test.                                                    |

## **Materials characterization**

X-ray diffraction (XRD) analysis was performed using a Bruker D2 Phaser operating at 45 kV and 30 mA to examine the crystalline structure of the anodized specimens. Raman spectroscopy measurements were conducted with a Renishaw Raman spectroscope utilizing a 532 nm excitation source. The morphology of the anodized samples was observed under high-vacuum conditions using a Quanta 3D FEG Scanning Electron Microscope (SEM). A platinum layer was deposited using ion beam technology at a 15 kV acceleration voltage to facilitate electron beam observation, achieving a resolution of 1.0 nm, a beam current of 10 pA, and a working distance of 10 mm. Elemental compositions were analyzed through energy-dispersive X-ray (EDX) analysis. The thickness of the oxide layer was determined by analyzing cross-sectional SEM images. Preparation of Transmission Electron Microscopy (TEM) lamella was conducted using a Helios Nano Lab 650 dual beam system, followed by examination using an aberration-corrected Titan 300 ST from FEI at an accelerating voltage of 300 kV. Chemical oxidation state analysis was performed using a Thermo Scientific ESCALAB Xi<sup>+</sup> X-ray Photoelectron Spectrometer (XPS) Microprobe, employing monochromatized Al (K $\alpha$ ) radiation with a spot size of 650 microns in diameter, operated at 190 W power and 14.5 kV.

## **Electrochemical Measurements**

The electrochemical performance for the Hydrogen Evolution Reaction (HER) and corrosion properties of the anodized stainless steel (SS) electrodes were evaluated using an electrochemical workstation (GAMRY Reference 3000, USA) employing a standard three-electrode configuration at room temperature. The prepared electrodes served directly as working electrodes, while Hg/HgO (1 M KOH) was utilized for HER and saturated Ag/AgCl for corrosion testing as reference electrodes. A graphite rod served as the counter electrode for HER, while a Pt gauze was

employed for corrosion testing. The 1 X 1 cm<sup>2</sup> working electrode area is soaked in the 1 M KOH electrolyte. Linear sweep voltammetry (LSV) is used at a scan rate of 5 mV s<sup>-1</sup> to assess the HER activity of the prepared electrodes. A compensation ratio of 90% is applied to the polarization curve to account for the electrolyte's ohmic resistance. Tafel slopes are calculated by fitting the linear segment of the Tafel curve to the Tafel equation,  $\eta = b \log(j) + a$ . Electrochemical impedance spectroscopy (EIS) was conducted using an AC voltage amplitude of 5 mV, within a test frequency range of 100 kHz to 1 Hz. Double layer capacitance ( $C_{dl}$ ) was assessed using the Cyclic Voltammetry (CV) technique within the range of 0.88 to 1.12 (vs RHE) at the different scan rates. Further, the double layer capacitance ( $C_{dl}$ ) can be converted into electrochemically active surface area (ECSA) by assuming the typical specific capacitance ( $C_s$ ) value is 0.04 mF cm<sup>-2</sup> for alkaline environments.<sup>1</sup>

$$ECSA = \frac{C_{dl}}{C_s} cm^2$$

To assess the long-term stability of the prepared electrodes, cyclic voltammetry (CV) tests comprising 2000 cycles were conducted at a scan rate of 100 mV s<sup>-1</sup>, while chronoamperometry (CA) tests were carried out at a current density of -20 mA cm<sup>-2</sup> for 50 hours. The potentials were converted to a reversible hydrogen electrode (RHE) scale for all HER activity investigations using the following formula.

$$E_{RHE} = E_{Hg/HgO} + 0.0591 pH + 0.098$$

To study their corrosion properties, the prepared electrodes were placed in a 3.5% NaCl (neutral environment) solution and a 1 M KOH (alkaline environment) solution. The open-circuit potential (OCP) was first measured for 30 min. Potentiodynamic polarization (PD) experiments were conducted from -0.20 V vs OCP to 0.4 V for NaCl and to 0.3 V vs Ag/AgCl for KOH, using a scan

rate of 10 mV/min. The Tafel module within the Gamry Echem analyst software was employed to compute the Tafel slopes, ascertain the corrosion current density ( $j_{\text{corr}}$ ), and perform extrapolation  $\pm 0.1$  V from  $E_{\text{corr}}$ .

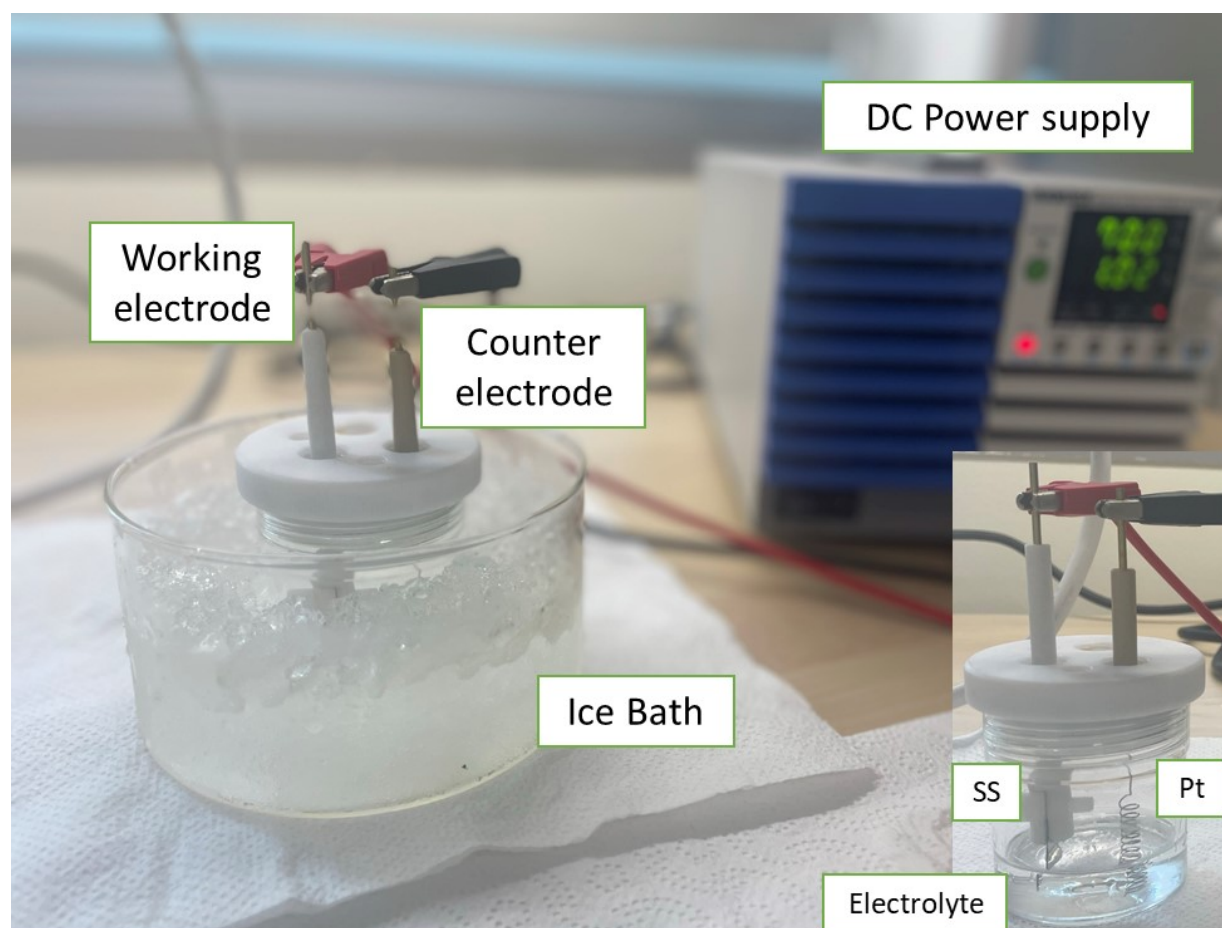

**Figure S1.** Digital image of an experimental setup for the anodization experiments.

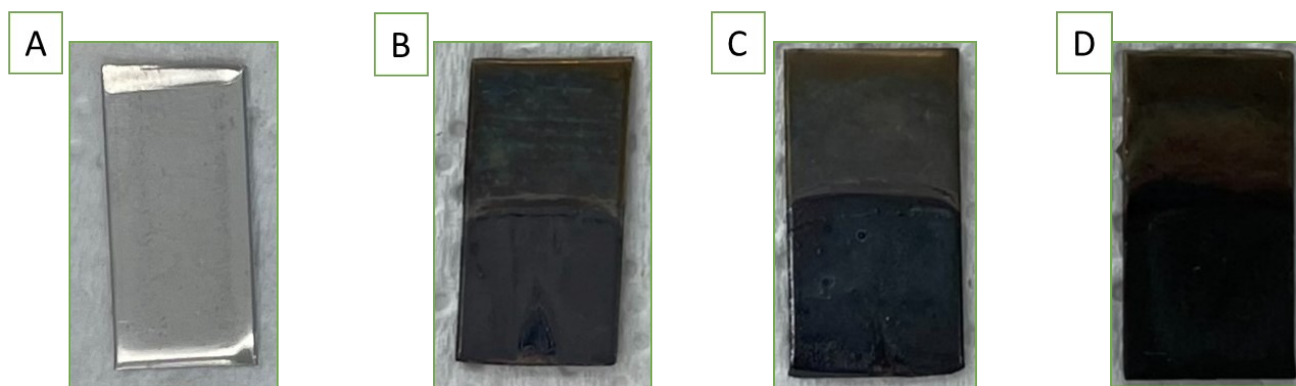

**Figure S2.** Digital images of bare SS (A), anodized SS samples (B-65 V; C-75 V; D- 85 V)

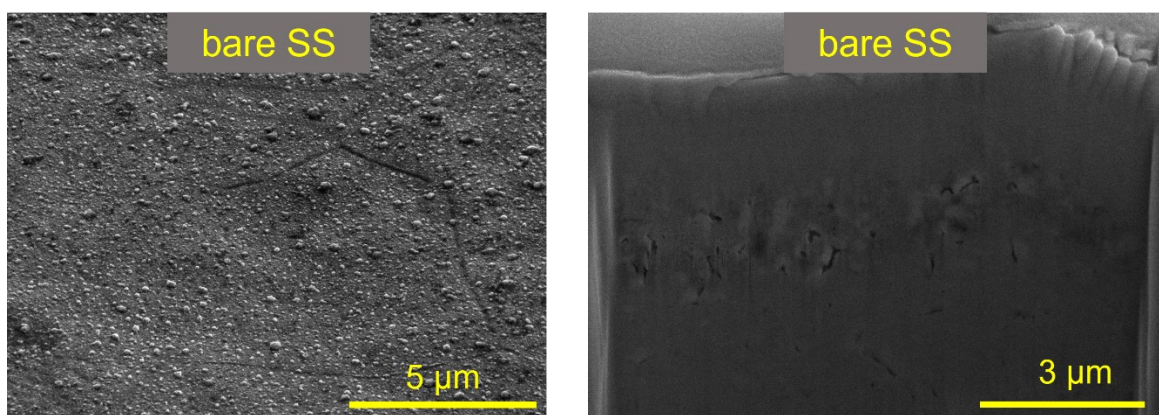

**Figure S3.** SEM and Cross-sectional images of bare SS<sup>2</sup>

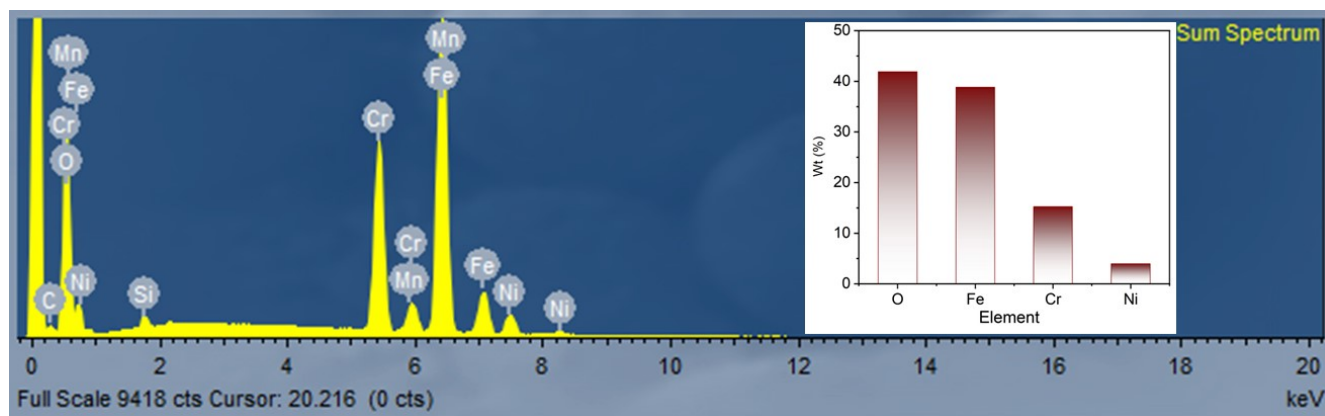

**Figure S4.** EDX spectrum and weight percentage for major elements of bare SS

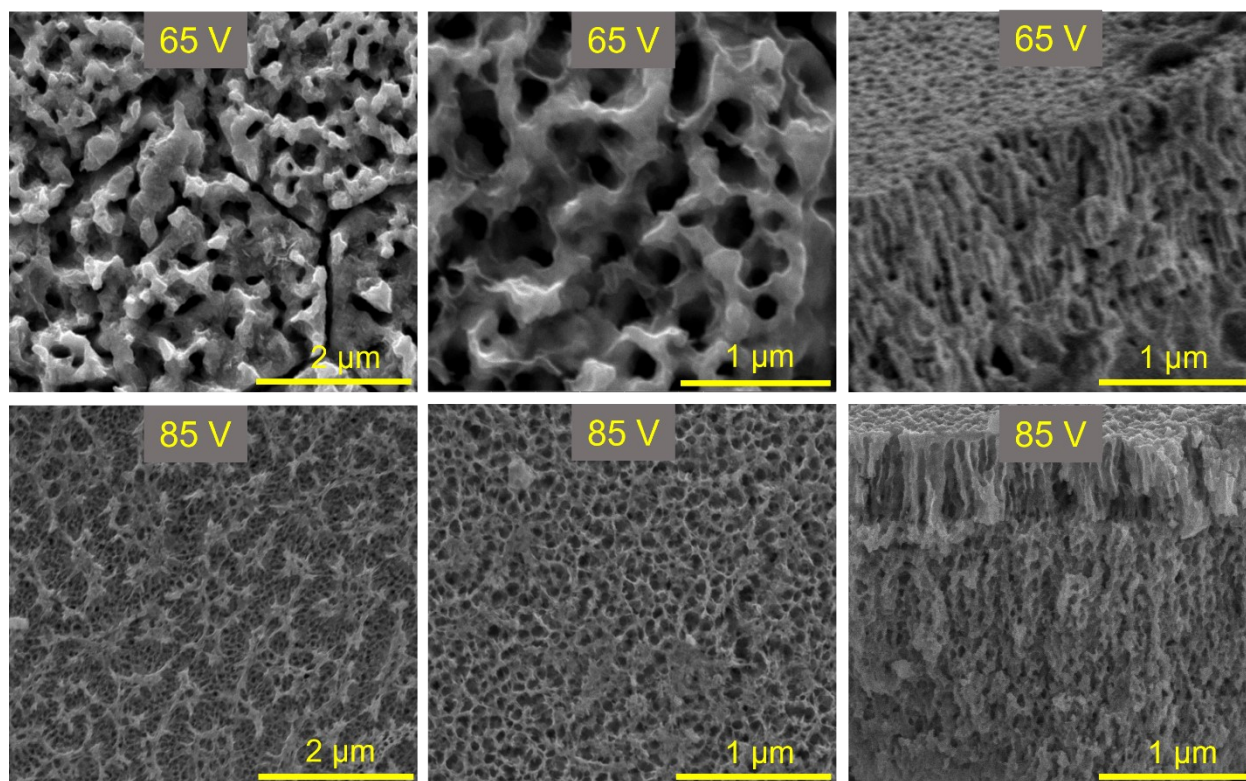

**Figure S5.** Low and high magnification SEM and Cross-sectional images of anodized SS samples.



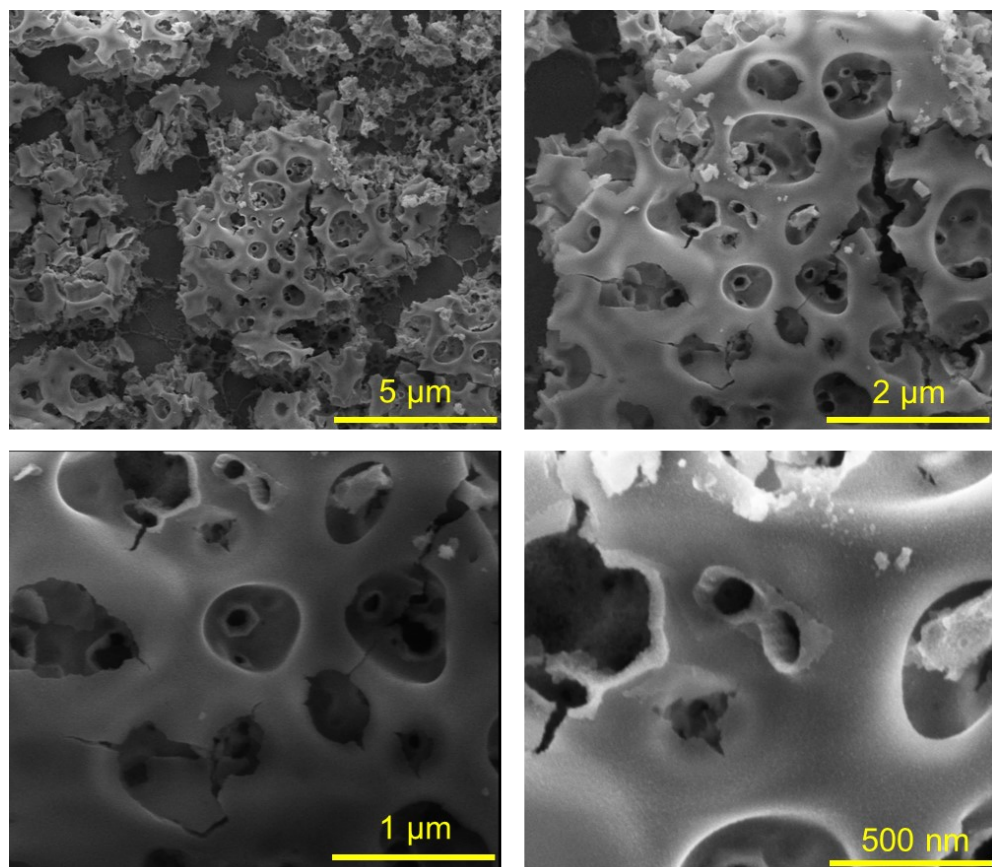

**Figure S6.** Low and high magnification SEM images of anodized SS-90 V sample

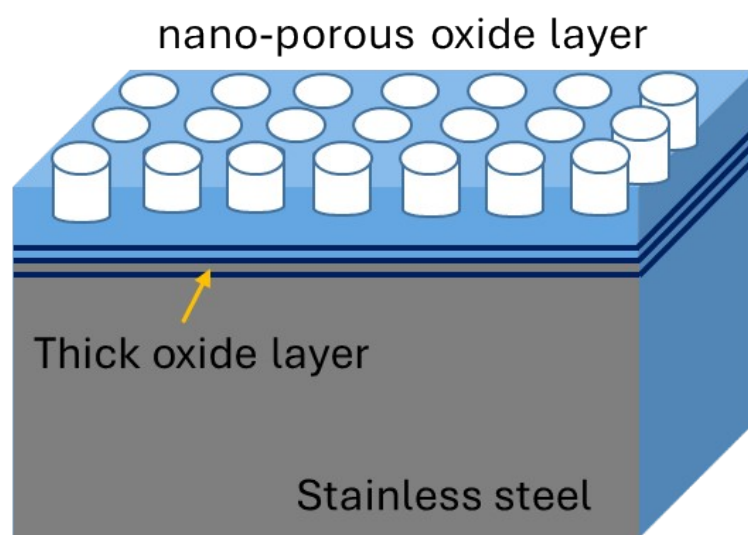

**Figure S7.** Schematic illustration of anodized stainless steel



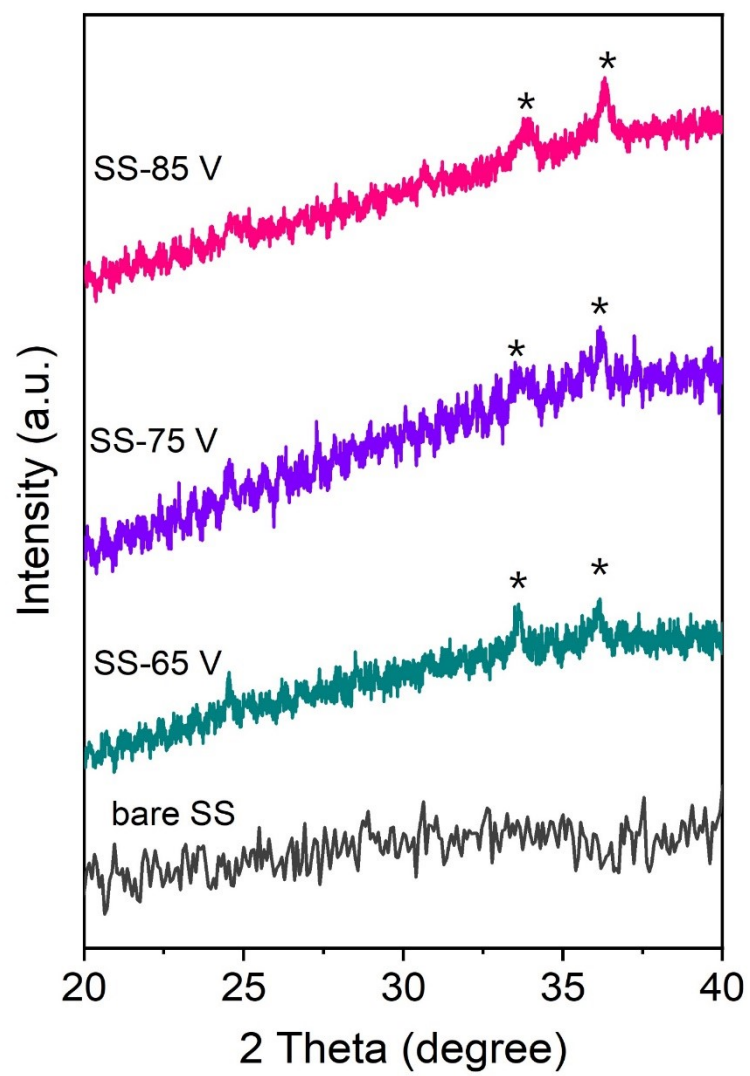

**Figure S8.** XRD patterns of bare SS and anodized SS samples

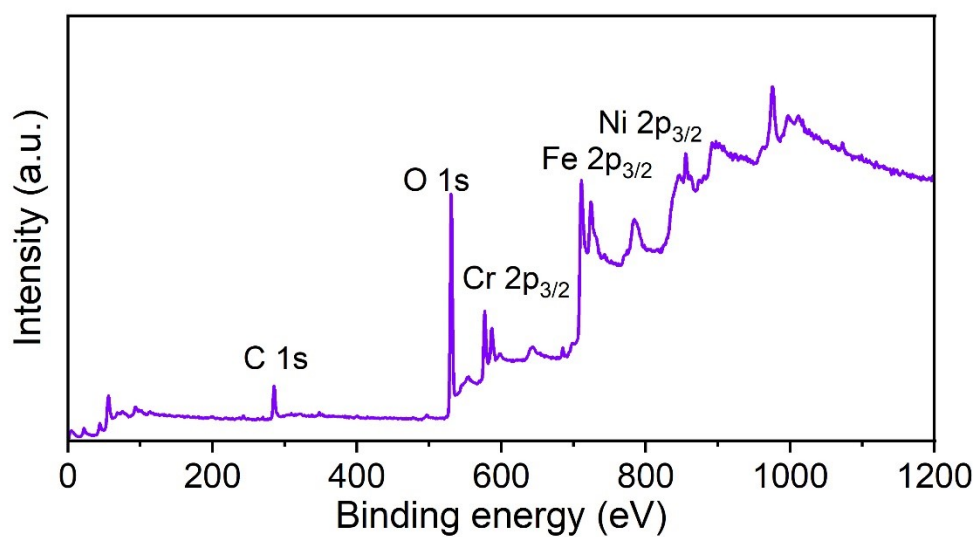

**Figure S9.** XPS survey spectrum of as-prepared anodized SS-75 V sample.

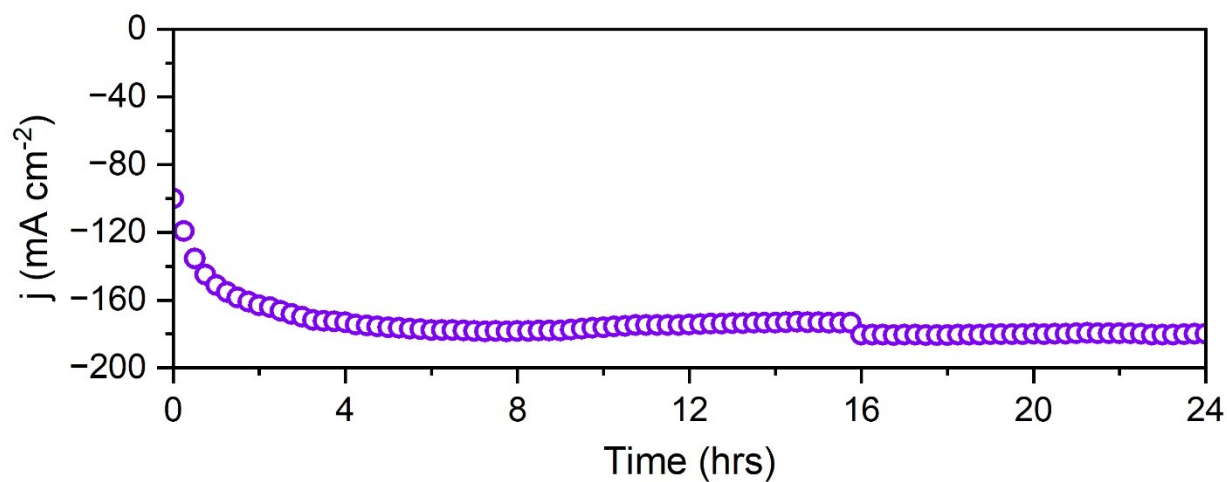

**Figure S10.** Long-term chronoamperometric (CA) stability measurement at  $-100 \text{ mA cm}^{-2}$  (applied potential  $-596 \text{ mV}$ ) for the SS-75 V electrode

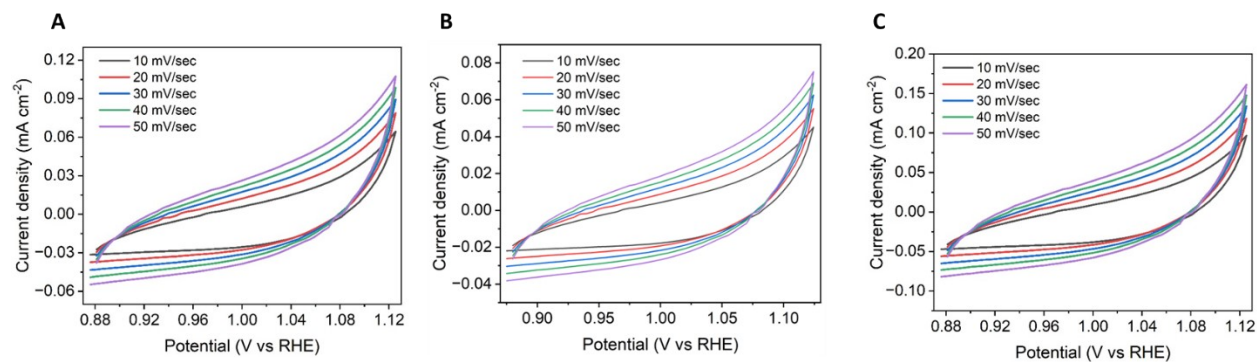

**Figure S11.** CV curves for anodized SS (A: SS-65 V; B: SS-75 V; C: SS-85 V) at different scan rates to estimate the  $C_{dl}$  in a non-faradic potential range.

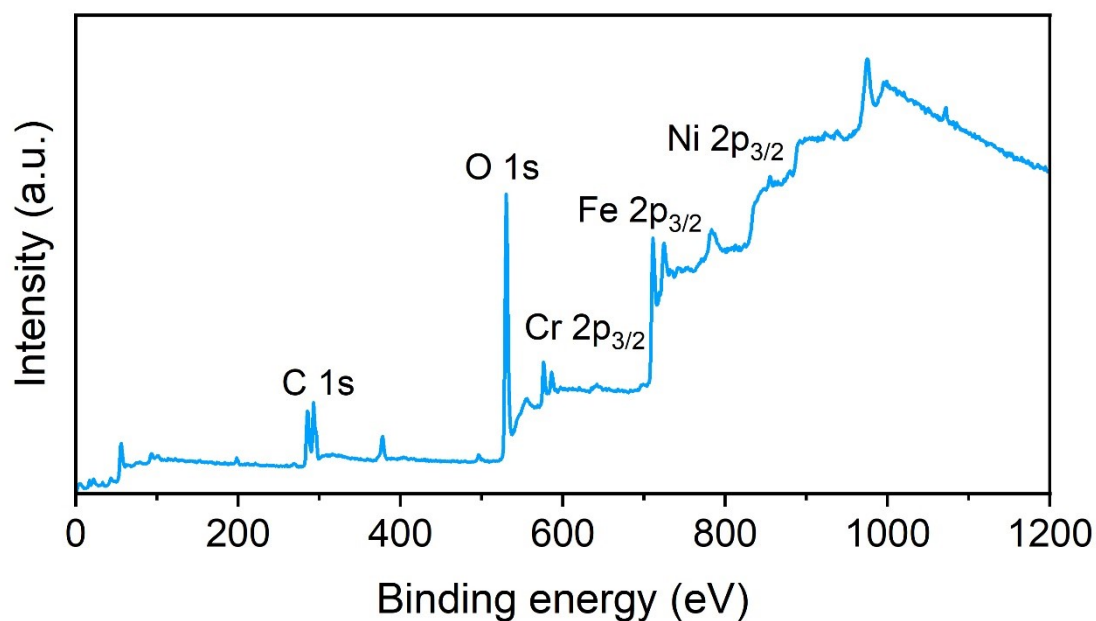

**Figure S12.** XPS survey spectrum of SS-75 V electrode after long-term (50 h) stability test.

## Reference

1. Zhai, L.; She, X.; Zhuang, L.; Li, Y.; Ding, R.; Guo, X.; Zhang, Y.; Zhu, Y.; Xu, K.; Fan, H. J.; Lau, S. P., Modulating Built-In Electric Field via Variable Oxygen Affinity for Robust Hydrogen Evolution Reaction in Neutral Media. *Angewandte Chemie International Edition* **2022**, *61* (14), e202116057.
2. Bose, R.; Suryaprakash Goud, G.; Helal, M. I.; Barsoum, I.; Cho, S. O.; Alfantazi, A., Self-Ordered Anodic Porous Oxide Layers as a High Performance Electrocatalyst for Water Oxidation. *ACS Applied Energy Materials* **2024** (<https://doi.org/10.1021/acsaem.4c00305>).
